# Supplementary material for: Expression Patterns and miRNA Regulation of DNA Methyltransferases in Chicken Primordial Germ Cells
Source: PubMed Central journal article supplement (PMC3086922; doi:10.1371/journal.pone.0019524), 2011-05-03
Supplement: pone.0019524.s002.pdf [file pone.0019524.s002.pdf]

-----MVESDTPKDTAAVPCPCPEASPAEPLPNGDLEADGA 40  
MPAMPSSSGPG--DTSSSAAREEDRDKGEEQEEPRGKEERQEPSTTARKVGRGPKRKRKHPVVESSGDTPKDPAVTSKSPSMAQDSCASELLPNGDLEKRSE 98  
---MPSSSGPG--DTSSSAAREEDRDKGEEQEEPRGKEERQEPSTTARKVGRGPKRKRKHPVVESSGDTPKDPAVTSKSPSMAQDPCASELLPNGDLEKRSE 95  
-----EGEEQEEBARAKEERQEPSTTARKVGRGPKRKRKHPVVESSDTPKDPVTSKSL SMAQDSSGSELYPNGDLEKRSE 74  
---MPSSSGPG--DTSSSAAREEDRKEGEEQEEPRGKEERQEPSTTARKVGRGPKRKRKHPVVESSDTPKDPTVTSKSPSMAQDSSGSELLPNGDLEKRSE 95  
---MPSSSGPG--DTSSISLEREDRKEGEEQEEPRGKEERQEPSTTARKVGRGPKRKRKHPVVESSDTPKDPVTSKSPSMAQDSSGSELLPNGDLEKRSE 95  
---MPSSSGPG--DTSSSLEREDRKEGEEQEEPRGKEERQEPSTTARKVGRGPKRKRKHPVVESSDTPKDPVTSKSPSMAQDSSGSELLPNGDLEKRSE 95  
---MPSSGATTVDNSSSLEREDRKEEELLESKKEERQDSTPMRKVGRGPKRKRKHPVVESSDTPKEVAPTSKAP SMAQDTCPSSELLPNGDVEKPSSE 97  
-----MNSMEDTGEVESPEPKKDVITVPLLFPPMPPTPTTPMQ-----QQPFO 44

QWKGTTEEGGASPSSCRPEEDETESLADGFTGRALENGRCTPKKEGLDAPADEGELAPSDPQKKRGRKLEATEKSKEEKENFDSLKMEGSRGRLRGGI 140  
PQPEEGSPAGGQKGGAPAEGEGAAETLPEASRAVENGCCCTPKDGRGAPAEAG-----KEQKE-TNIESMKMEGSRGRLRGGI 174  
PQPEEGSPAGGQKGGAPAEGEGAAETLPEASRAVENGCCCTPKDGRGAPAEVGC-----KEQKE-TNIESMKMEGSRGRLRGGI 171  
----- 1  
PQPEEGSPAGGQKGGAPAEGEGATETPPEASRAVENGCCCTPKDGRGAPAEAG-----KEQKE-TNIESMKMEGSRGRLRGGI 150  
PQPEEGSPAGGQKGGAPAEGEGAAETPPEASRAVENGCCCTPKDGRGAPAEAG-----KEQKE-TNIESMKMEGSRGRLRGGI 171  
PQPEEGSPAAGQKGGAPAEGEG-TETPPEASRAVENGCCVTKEGRGASAGEG-----KEQKE-TNIESMKMEGSRGRLRGGI 170  
PQPEEGSPAAGQKGGAPAEGEG-TETPPEASRAVENGCCVTKEGRGASAGEG-----KEQKE-TNIESMKMEGSRGRLRGGI 170  
PQPEEGSPAG-RKGGARAEGEAEASAPAAARTLENGCCCTPKDQEAPEVVG-----KEEKENFDSLKMEGSRGRLRGGI 173  
PQAQH----- 49

GWESSLRQRPMPRLTFQAGDPYYISKRRKDEWLARWKRAEAKKAKVIAVMNVVEETP-RAEPQKEEASPPASQOPTDPASPNVATTPEPVVADAVDKNT 239  
GWESSLRQRPMPRLTFQAGDPYYISKRRKDEWLARWKRAEAKKAKVIAVMNAVEENQGPESQKVEEASPPAVQOPTDPASPTVATTPEPVGS DAGDKNA 274  
GWESSLRQRPMPRLTFQAGDPYYISKRRKDEWLARWKRAEAKKAKVIAVMNAVEENQGPESQKVEEASPPAVQOPTDPASPTVATTPEPVGS DAGDKNA 271  
-----MNAVEENQGSTESQKVEEASPPAVQOPTDPASPTVATTPEPVGADAGDKNA 51  
GWESSLRQRPMPRLTFQAGDPYYISKRRKDEWLARWKRAEAKKAKVIAVMNAVEENQGSTESQKVEEASPPAVQOPTDPASPTVATTPEPVGADAGDKNA 250  
GWESSLRQRPMPRLTFQAGDPYYISKRRKDEWLARWKRAEAKKAKVIAVMNAVEENQGSTESQKVEEASPPAVQOPTDPASPTVATTPEPVGADAGDKNA 271  
GWESSLRQRPMPRLTFQAGDPYYISKRRKDEWLARWKRAEAKKAKVIAVMNAVEENQGSTESQKVEEASPPAVQOPTDPASPTVATTPEPVGADAGDKNA 270  
GWESSLRQRPMPRLTFQAGDPYYISKRRKDEWLARWKRAEAKKAKVIAVMNAVEENQGSTESQKVEEASPPAVQOPTDPASPTVATTPEPVGADAGDKNA 270  
GWESSLRQRPMPRLTFQAGDPYYISKRRKDEWLARWKRAEAKKAKVIAVMNVVEENQGPESQKVEEASPPAVQOPTDPASPTVATTPEPVGADAGDKNT 273  
--QTNLKPQESP-----QQPFPFQQQQ-----QQPTDPASPTVATTPEPVSIGDGDKT 98

→ PWWP domain ←

SKSADDEPEYEDGRGFLGIGELVWGKLRGFSWWPGRIVSWWMTGRSRAAEGTRVWMMWFGDGKFSVVCVEKLLPLSSFS SAFHQATYNKQPMYRKAIYEVLQ 339  
TKACDDEPEYEDGRGFGIGELVWGKLRGFSWWPGRIVSWWMTGRSRAAEGTRVWMMWFGDGKFSVVCVEKLMPLSSFCSAFHQATYNKQPMYRKAIYEVLQ 374  
TKACDDEPEYEDGRGFGIGELVWGKLRGFSWWPGRIVSWWMTGRSRAAEGTRVWMMWFGDGKFSVVCVEKLMPLSSFCSAFHQATYNKQPMYRKAIYEVLQ 371  
TKSADDEPEYEDGRGFGIGELVWGKLRGFSWWPGRIVSWWMTGRSRAAEGTRVWMMWFGDGKFSVVCVEKLMPLSSFCSAFHQATYNKQPMYRKAIYEVLQ 151  
TKAADDEPEYEDGRGFGIGELVWGKLRGFSWWPGRIVSWWMTGRSRAAEGTRVWMMWFGDGKFSVVCVEKLMPLSSFCSAFHQATYNKQPMYRKAIYEVLQ 350  
TKAADDEPEYEDGRGFGIGELVWGKLRGFSWWPGRIVSWWMTGRSRAAEGTRVWMMWFGDGKFSVVCVEKLMPLSSFCSAFHQATYNKQPMYRKAIYEVLQ 371  
TKAADDEPEYEDGRGFGIGELVWGKLRGFSWWPGRIVSWWMTGRSRAAEGTRVWMMWFGDGKFSVVCVEKLMPLSSFCSAFHQATYNKQPMYRKAIYEVLQ 370  
TKAADDEPEYEDGRGFGIGELVWGKLRGFSWWPGRIVSWWMTGRSRAAEGTRVWMMWFGDGKFSVVCVEKLMPLSSFCSAFHQATYNKQPMYRKAIYEVLQ 370  
AKASDDEPEYEDGRGFGIGELVWGKLRGFSWWPGRIVSWWMTGRSRAAEGTRVWMMWFGDGKFSVVCVEKLMPLSSFCSAFHQATYNKQPMYRKAIYEVLQ 373  
PKS--TTESEYEDGRGFGINELVWGKLRGFSWWPGRVSWRMTLRSPA AEGTRVWTFWFGDGKFSVVCVEKLLPLSSFHNAFHQP YNKQPMYKKAIFEVLQ 196

VASSRAGKLFPA CPENDESDTAKAVEVQNKQMI EWALGGFQPSGPKGLEPPEEKNPYKEVYTD MW--VEPEAAAYAPPPAKKPKRS--TTEKPKVKEII 436  
VASSRAGKLFVCHDSDES DTAKAVEVQNKQMI EWALGGFQPSGPKGLEPPEEKNPYKEVYTD MW--VEPEAAAYAPPPAKKPKRS--TAEKPKVKEII 471  
VASSRAGKLFVCHDSDES DTAKAVEVQNKQMI EWALGGFQPSGPKGLEPPEEKNPYKEVYTD MW--VEPEAAAYAPPPAKKPKRS--TAEKPKVKEII 468  
VASSRAGKLFVCHDNDES DTAKAVEVQNKQMI EWALGGFQPSGPKGLEPPEEKNPYKEVYTD MW--VEPEAAAYAPPPAKKPKRS--TTEKPKVKEII 248  
VASSRAGKLFPMCHDSDES DTAKAVEVQNKQMI EWALGGFQPSGPKGLEPPEEKNPYKEVYTD MW--VEPEAAAYAPPPAKKPKRS--TTEKPKVKEII 447  
VASSRAGKLFVCHDNDES DTAKAVEVQNKQMI EWALGGFQPSGPKGLEPPEEKNPYKEVYTD MW--VEPEAAAYAPPPAKKPKRS--TTEKPKVKEII 468  
VASSRAGKLFVCHDSDES DTAKAVEVQNKQMI EWALGGFQPSGPKGLEPPEEKNPYKEVYTD MW--VEPEAAAYAPPPAKKPKRS--TTEKPKVKEII 467  
VASSRAGKLFVCHDSDES DTAKAVEVQNKQMI EWALGGFQPSGPKGLEPPEEKNPYKEVYTD MW--VEPEAAAYAPPPAKKPKRS--TTEKPKVKEII 467  
VASSRAGKLFVCHDSDES DTAKAVEVQNKQMI EWALGGFQPSGPKGLEPPEEKNPYKEVYTD MW--VEPEAAAYAPPPAKKPKRS--TTEKPKVKEII 472  
VASTRAGKTLFSLCPASDSDTSSKLVVDEENKMI EWAMSGFOPTGPKGLEPPEEKNPYKEVYTD MW--VEPEAAAYAPPPAKKPKRS--TAEKPKVKEII 288

DERTRERLVYEVQRKCRNIEDICISCGSLNVTLEHPLF IGGMCQCNKCFLECAQYD DDGYQSYCTICCGGREVLMCGNNNCCRCFCVCEVDLLVGPGA 536  
DERTRERLVYEVQRKCRNIEDICISCGSLNVTLEHPLF VGGMCQCNKCFLECAQYD DDGYQSYCTICCGGREVLMCGNNNCCRCFCVCEVDLLVGPGA 571  
DERTRERLVYEVQRKCRNIEDICISCGSLNVTLEHPLF VGGMCQCNKCFLECAQYD DDGYQSYCTICCGGREVLMCGNNNCCRCFCVCEVDLLVGPGA 568  
DERTRERLVYEVQRKCRNIEDICISCGSLNVTLEHPLF IGGMCQCNKCFLECAQYD DDGYQSYCTICCGGREVLMCGNNNCCRCFCVCEVDLLVGPGA 348  
DERTRERLVYEVQRKCRNIEDICISCGSLNVTLEHPLF IGGMCQCNKCFLECAQYD DDGYQSYCTICCGGREVLMCGNNNCCRCFCVCEVDLLVGPGA 547  
DERTRERLVYEVQRKCRNIEDICISCGSLNVTLEHPLF IGGMCQCNKCFLECAQYD DDGYQSYCTICCGGREVLMCGNNNCCRCFCVCEVDLLVGPGA 568  
DERTRERLVYEVQRKCRNIEDICISCGSLNVTLEHPLF IGGMCQCNKCFLECAQYD DDGYQSYCTICCGGREVLMCGNNNCCRCFCVCEVDLLVGPGA 567  
DERTRERLVYEVQRKCRNIEDICISCGSLNVTLEHPLF IGGMCQCNKCFLECAQYD DDGYQSYCTICCGGREVLMCGNNNCCRCFCVCEVDLLVGPGA 567  
DERTRERLVYEVQRKCRNIEDICISCGSLNVTLEHPLF IGGMCQCNKCFLECAQYD DDGYQSYCTICCGGREVLMCGNNNCCRCFCVCEVDLLVGPGA 572  
DERTRERLVYEVQRKCRNIEDICISCGSLNVTLEHPLF IGGMCQCNKCFLECAQYD DDGYQSYCTICCGGREVLMCGNNNCCRCFCVCEVDLLVGPGA 388

→ DNA Methylase domain

AQAAIKEDPWNCYMGHGKTYGLLRRREDWPSRLQMF FANNHDQEFDPKVPYPPVPAEKRRKPIRVLSLFDGIATGLLVKDLGLIQVDRIYASEVCEDSIT 636  
AQAAIKEDPWNCYMGHGKTYGLLRRREDWPSRLQMF FANNHDQEFDPKVPYPPVPAEKRRKPIRVLSLFDGIATGLLVKDLGLIQVDRIYASEVCEDSIT 671  
AQAAIKEDPWNCYMGHGKTYGLLRRREDWPSRLQMF FANNHDQEFDPKVPYPPVPAEKRRKPIRVLSLFDGIATGLLVKDLGLIQVDRIYASEVCEDSIT 668  
AQAAIKEDPWNCYMGHGKTYGLLRRREDWPSRLQMF FANNHDQEFDPKVPYPPVPAEKRRKPIRVLSLFDGIATGLLVKDLGLIQVDRIYASEVCEDSIT 448  
AQAAIKEDPWNCYMGHGKTYGLLRRREDWPSRLQMF FANNHDQEFDPKVPYPPVPAEKRRKPIRVLSLFDGIATGLLVKDLGLIQVDRIYASEVCEDSIT 647

AQAAIKEDPWNCYMCGHKGTGYGLLRREDWPSRLQMF FANNHDQEFDPKVPYPPVPAEKRKPIRVLSLFDGIATGLLVKDLGLIQVDRYIASEVCEDSIT 668  
AQAAIKEDPWNCYMCGHKGTGYGLLRREDWPSRLQMF FANNHDQEFDPKVPYPPVPAEKRKPIRVLSLFDGIATGLLVKDLGLIQVDRYIASEVCEDSIT 667  
AQAAIKEDPWNCYMCGHKGTGYGLLRREDWPSRLQMF FANNHDQEFDPKVPYPPVPAEKRKPIRVLSLFDGIATGLLVKDLGLIQVDRYIASEVCEDSIT 667  
AQAAIKEDPWNCYMCGHKGTGYGLLRREDWPSRLQMF FANNHDQEFDPKVPYPPVPAEKRKPIRVLSLFDGIATGLLVKDLGLIQVDRYIASEVCEDSIT 672  
AQAAIKEDPWNCYMCGLKLTQYGLLRERRADWPCRLQHFFANNHDQEFEPRLYPVLAENRKPPIRVLSLFDGIATGLLVRELGIQVERVYIASEVCEDSIT 488

VGMVRHQGKIMYVGDVRSVTQKHIQEWGPFDLVIGGSPCNDLSIVNPARKGLYEGTGRLLFFEFYRLLHEDARPKEGDDRPFFWL FENVVAMGVSDKRDISR 736  
VGMVRHQGKIMYVGDVRSVTQKHIQEWGPFDLVIGGSPCNDLSIVNPARKGLYEGTGRLLFFEFYRLLHEDARPKEGDDRPFFWL FENVVAMGVSDKRDISR 771  
VGMVRHQGKIMYVGDVRSVTQKHIQEWGPFDLVIGGSPCNDLSIVNPARKGLYEGTGRLLFFEFYRLLHEDARPKEGDDRPFFWL FENVVAMGVSDKRDISR 768  
VGMVRHQGKIMYVGDVRSVTQKHIQEWGPFDLVIGGSPCNDLSIVNPARKGLYEGTGRLLFFEFYRLLHEDARPKEGDDRPFFWL FENVVAMGVSDKRDISR 548  
VGMVRHQGKIMYVGDVRSVTQKHIQEWGPFDLVIGGSPCNDLSIVNPARKGLYEGTGRLLFFEFYRLLHEDARPKEGDDRPFFWL FENVVAMGVSDKRDISR 747  
VGMVRHQGKIMYVGDVRSVTQKHIQEWGPFDLVIGGSPCNDLSIVNPARKGLYEGTGRLLFFEFYRLLHEDARPKEGDDRPFFWL FENVVAMGVSDKRDISR 768  
VGMVRHQGKIMYVGDVRSVTQKHIQEWGPFDLVIGGSPCNDLSIVNPARKGLYEGTGRLLFFEFYRLLHEDARPKEGDDRPFFWL FENVVAMGVSDKRDISR 767  
VGMVRHQGKIMYVGDVRSVTQKHIQEWGPFDLVIGGSPCNDLSIVNPARKGLYEGTGRLLFFEFYRLLHEDARPKEGDDRPFFWL FENVVAMGVSDKRDISR 767  
VGMVRHQGKIMYVGDVRSVTQKHIQEWGPFDLVIGGSPCNDLSIVNPARKGLYEGTGRLLFFEFYRLLHEDARPKEGDDRPFFWL FENVVAMGVSDKRDISR 772  
VGMVRHQGKIMYVGDVRSVTQKHIQEWGPFDLVIGGSPCNDLSIVNPARKGLYEGTGRLLFFEFYRLLHEDARPKEGDDRPFFWL FENVVAMGVSDKRDISR 588

←  
FLESNPVMIDAKEVSAHRARYFWGNLPGMNRPLASTVNDKLELQECLEHGRIAKFSKVRTITTRSNSIKQGKDQHFVFMNEKEDILWCTEMERVFGFP 836  
FLESNPVMIDAKEVSAHRARYFWGNLPGMNRPLASTVNDKLELQECLEHGRIAKFSKVRTITTRSNSIKQGKDQHFVFMNEKEDILWCTEMERVFGFP 871  
FLESNPVMIDAKEVSAHRARYFWGNLPGMNRPLASTVNDKLELQECLEHGRIAKFSKVRTITTRSNSIKQGKDQHFVFMNEKEDILWCTEMERVFGFP 868  
FLESNPVMIDAKEVSAHRARYFWGNLPGMNRPLASTVNDKLELQECLEHGRIAKFSKVRTITTRSNSIKQGKDQHFVFMNEKEDILWCTEMERVFGFP 648  
FLESNPVMIDAKEVSAHRARYFWGNLPGMNRPLASTVNDKLELQECLEHGRIAKFSKVRTITTRSNSIKQGKDQHFVFMNEKEDILWCTEMERVFGFP 847  
FLESNPVMIDAKEVSAHRARYFWGNLPGMNRPLASTVNDKLELQECLEHGRIAKFSKVRTITTRSNSIKQGKDQHFVFMNEKEDILWCTEMERVFGFP 868  
FLESNPVMIDAKEVSAHRARYFWGNLPGMNRPLASTVNDKLELQECLEHGRIAKFSKVRTITTRSNSIKQGKDQHFVFMNEKEDILWCTEMERVFGFP 867  
FLESNPVMIDAKEVSAHRARYFWGNLPGMNRPLASTVNDKLELQECLEHGRIAKFSKVRTITTRSNSIKQGKDQHFVFMNEKEDILWCTEMERVFGFP 867  
FLESNPVMIDAKEVSAHRARYFWGNLPGMNRPLASTVNDKLELQECLEHGRIAKFSKVRTITTRSNSIKQGKDQHFVFMNEKEDILWCTEMERVFGFP 872  
FLESNPVMIDAKEVSAHRARYFWGNLPGMNRPLASTVNDKLELQECLEHGRIAKFSKVRTITTRSNSIKQGKDQHFVFMNEKEDILWCTEMERVFGFP 688

VHYTDVSNMSRLARQRLGRSWSVPVIRHLFAPLKEYFACV-- 877aa, chickenDNMT3A  
VHYTDVSNMSRLARQRLGRSWSVPVIRHLFAPLKEYFACV-- 912aa, humanDNMT3A  
VHYTDVSNMSRLARQRLGRSWSVPVIRHLFAPLKEYFACV-- 909aa, chimpanzeeDNMT3A  
VHYTDVSNMSRLARQRLGRSWSVPVIRHLFAPLKEYFACV-- 689aa, pigDNMT3A  
VHYTDVSNMSRLARQRLGRSWSVPVIRHLFAPLKEYFACV-- 888aa, cattleDNMT3A  
VHYTDVSNMSRLARQRLGRSWSVPVIRHLFAPLKEYFACV-- 909aa, horseDNMT3A  
VHYTDVSNMSRLARQRLGRSWSVPVIRHLFAPLKEYFACV-- 908aa, ratDNMT3A  
VHYTDVSNMSRLARQRLGRSWSVPVIRHLFAPLKEYFACV-- 908aa, mouseDNMT3A  
VHYTDVSNMSRLARQRLGRSWSVPVIRHLFAPLKEYFACV-- 913aa, opossumDNMT3A  
VHYTDVSNMSRLARQRLGRSWSVPVIRHLFAPLKEYFACVGT 731aa, zebrafishDNMT3A
