# Supplementary material for: Expression Patterns and miRNA Regulation of DNA Methyltransferases in Chicken Primordial Germ Cells
Source: PubMed Central journal article supplement (PMC3086922; doi:10.1371/journal.pone.0019524), 2011-05-03
Supplement: pone.0019524.s003.pdf [file pone.0019524.s003.pdf]

DDSAAADYCPPPKRLKTN--CYNNGKDRGEEDQSREOMALDVTNPKSLEDSCLSCGRKNPVSFHPLFEGGLCQTCRDRFLELFYMYDDDGYSYCTVCC 466  
 IDFAASEYSTPPKRLKTN--SYG--GKDRGDEEESRERMASDVTNNGKLEDRCLSCGKKNPVSFHPLFEGGLCQSCRDRFLELFYMYDEEDGYQSYCTVCC 488  
 NDSAASE-SPPPKRLKTN--SYG--GKDRGDEEESRERMASEVTNNGKLEDRCLSCGKKNPVSFHPLFEGGLCQSCRDRFLELFYMYDEEDGYQSYCTVCC 488  
 EEVTVDLSLPPPKRLKPS--CVNNKKEVEEDQSREKMSVSLKNNKSNPELSCIAAGRRNPPSFHPLFEGGLCHTCRDRFLELFYMYDDDGYSYCTVCC 386  
 LESSPPEFP--SAKRARLP--LNKAKPGIEEVSREQMVNEVLKMHRSIEEFCLSCGKTRVATFHPLFEGGLCLTCKDAYLENSYMYDDDGYSYCTVCC 446

→

GKELLLCSNA--SCCRFCVCECLEVLVGRGSSAKAKEQEPWNCYMCQPORSYGVLRQXQDSSRLQDFFTSK--GEYDAPKIYPVPPAKRRRPIRVLSLFD 576  
 GRELLLCNSNTSCCRFCVCECLEVLVGTGTAAEAKLQEPWSCYMCLPQRCHGVLRRRKDNVRLQAFFTSDT--GLEYEAPKLYPAIPAARRRPIRVLSLFD 582  
 GRELLLCNSNTSCCRFCVCECLEVLVGTGTAAEAKLQEPWSCYMCLPQRCHGVLRRRKDNVRLQAFFTSDT--GLEYEAPKLYPAIPAARRRPIRVLSLFD 575  
 GRELLLCNSNTSCCRFCVCECLEVLVGTGTAAEAKLQEPWSCYMCLPQRCHGVLRRRKDNVRLQAFFTSDT--GLEYEAPKLYPAIPAARRRPIRVLSLFD 581  
 GRELLLCNSNTSCCRFCVCECLEVLVGTGTAAEAKLQEPWSCYMCLPQRCHGVLRRRKDNVRLQAFFTSDT--GLEYEAPKLYPAIPAARRRPIRVLSLFD 573  
 GRELLLCNSNTSCCRFCVCECLEVLVGTGTAAEAKLQEPWSCYMCLPQRCHGVLRRRKDNVRLQAFFTSDT--GLEYEAPKLYPAIPAARRRPIRVLSLFD 565  
 GRELLLCNSNTSCCRFCVCECLEVLVGTGTAAEAKLQEPWSCYMCLPQRCHGVLRRRKDNVRLQAFFTSDT--GLEYEAPKLYPAIPAARRRPIRVLSLFD 588  
 GRELLLCNSNTSCCRFCVCECLEVLVGTGTAAEAKLQEPWSCYMCLPQRCHGVLRRRKDNVRLQAFFTSDT--GLEYEAPKLYPAIPAARRRPIRVLSLFD 588  
 GRELLLCNSNTSCCRFCVCECLEVLVGTGTAAEAKLQEPWSCYMCLPQRCHGVLRRRKDNVRLQAFFTSDT--GLEYEAPKLYPAIPAARRRPIRVLSLFD 485  
 GRELLLCNSNTSCCRFCVCECLEVLVGTGTAAEAKLQEPWSCYMCLPQRCHGVLRRRKDNVRLQAFFTSDT--GLEYEAPKLYPAIPAARRRPIRVLSLFD 545

**DNA Methylase domain**

←

GIATGYLVKDLGIQVEKYIASEICEDPLAVGTVRHEGNIITYVH--DVRNITKRNIEEWGPFDLVIGGSPCNDLSLASPERKAPVGEAAWPHGAGSPQAA 674  
 GIATGYLVKELGKIKVGYVASEVCEESIAVGTVKHEGNIKYV--DVRNITKRNIEEWGPFDLVIGGSPCNDLSNVNPAKGLY----- 665  
 GIATGYLVKELGKIKVGYVASEVCEESIAVGTVKHEGNIKYV--DVRNITKRNIEEWGPFDLVIGGSPCNDLSNVNPAKGLY----- 658  
 GIATGYLVKELGKIKVGYVASEVCEESIAVGTVKHEGNIKYV--DVRNITKRNIEEWGPFDLVIGGSPCNDLSNVNPAKGLY----- 664  
 GIATGYLVKELGKIKVGYVASEVCEESIAVGTVKHEGNIKYV--DVRNITKRNIEEWGPFDLVIGGSPCNDLSNVNPAKGLY----- 656  
 GIATGYLVKELGKIKVGYVASEVCEESIAVGTVKHEGNIKYV--DVRNITKRNIEEWGPFDLVIGGSPCNDLSNVNPAKGLY----- 649  
 GIATGYLVKDLGIQVEKYIASEICEDPLAVGTVRHEGNIITYVH--DVRNITKRNIEEWGPFDLVIGGSPCNDLSLASPERKAPVGEAAWPHGAGSPQAA 671  
 GIATGYLVKELGKIKVGYVASEVCEESIAVGTVKHEGNIKYV--DVRNITKRNIEEWGPFDLVIGGSPCNDLSNVNPAKGLY----- 671  
 GIATGYLVKELGKIKVGYVASEVCEESIAVGTVKHEGNIKYV--DVRNITKRNIEEWGPFDLVIGGSPCNDLSNVNPAKGLY----- 568  
 GIATGYLVKELGKIKVGYVASEVCEESIAVGTVKHEGNIKYV--DVRNITKRNIEEWGPFDLVIGGSPCNDLSNVNPAKGLY----- 628

WGRRRSCAVAPSGDTCQALSPGPPPEVPTPQPNLRGRGRSPNTPAGSPRT EGTGRLFFEFYHLLNYARPKACEERPFFWMFENVVAMRVNDKRDISR 774  
 ----- EGTGRLFFEFYHLLNYSRPKEGDDRPFFWMFENVVAMKVGDKRDISR 713  
 ----- EGTGRLFFEFYHLLNYSRPKEGDDRPFFWMFENVVAMKVGDKRDISR 906  
 ----- EGTGRLFFEFYHLLNYSRKEGDDRPFFWMFENVVAMQVGDKRDISR 712  
 ----- EGTGRLFFEFYHLLNYSRPKEGDDRPFFWMFENVVAMKVGDKRDISR 704  
 ----- EGTGRLFFEFYHLLNYSRPKEGDDRPFFWMFENVVAMKVGDKRDISR 697  
 ----- EGTGRLFFEFYHLLNYSRPKEGDDRPFFWMFENVVAMKVGDKRDISR 719  
 ----- EGTGRLFFEFYHLLNYSRPKEGDDRPFFWMFENVVAMKVGDKRDISR 719  
 ----- EGTGRLFFEFYHLLNYSRPKEGDDRPFFWMFENVVAMRVNDKRDISR 616  
 ----- EGTGRLFFEFYHLLNYSRPKEGDDRPFFWMFENVVAMRVNDKRDISR 676

LECNPVMIDAIKISAHRARYFWGNLPGMN-----RIFGFPV 811  
 LECNPVMIDAIKVSAHRARYFWGNLPGMNRPVIAASKNDKLELQDCELYNRIAKLKKVQITITTKSNSIKQGNQLFPVVMNGKEDVLWCTELERIFGFPV 813  
 LECNPVMIDAIKVSAHRARYFWGNLPGMNRPVIAASKNDKLELQDCELYNRIAKLKKVQITITTKSNSIKQGNQLFPVVMNGKEDVLWCTELERIFGFPV 1006  
 LECNPVMIDAIKVSAHRARYFWGNLPGMNRPVIAASKNDKLELQDCELYNRIAKLKKVQITITTKSNSIKQGNQLFPVVMNGKEDVLWCTELERIFGFPV 812  
 LECNPVMIDAIKVSAHRARYFWGNLPGMNRPVIAASKNDKLELQDCELYNRIAKLKKVQITITTKSNSIKQGNQLFPVVMNGKEDVLWCTELERIFGFPV 804  
 LECNPVMIDAIKVSAHRARYFWGNLPGMN-----RIFGFPV 734  
 LECNPVMIDAIKVSAHRARYFWGNLPGMNRPVIAASKNDKLELQDCELYNRIAKLKKVQITITTKSNSIKQGNQLFPVVMNGKEDVLWCTELERIFGFPV 819  
 LECNPVMIDAIKVSAHRARYFWGNLPGMNRPVIAASKNDKLELQDCELYNRIAKLKKVQITITTKSNSIKQGNQLFPVVMNGKEDVLWCTELERIFGFPV 819  
 LECNPVMIDAIKVSAHRARYFWGNLPGMNRPVIAASKNDKLELQDCELYNRIAKLKKVQITITTKSNSIKQGNQLFPVVMNGKEDVLWCTELERIFGFPV 716  
 LECNPVMIDAIEVSAHRARYFWGNLPGMNRPVIAASKNDKLELQDCELYNRIAKLKKVQITITTKSNSIKQGNQLFPVVMNGKEDVLWCTELERIFGFPV 776

HCTDVSNSISRGARQKLLGRSWSIPVIOHLFSPLKDYFACE 851aa, chickenDNMT3B  
 HYTDVSNMGRGARQKLLGRSWSVPVIRHLFAPLKDYFACE 853aa, humanDNMT3B  
 HYTDVSNMGRGARQKLLGRSWSVPVIRHLFAPLKDYFACE 1046aa, chimpanzeeDNMT3B  
 HYTDVSNMGRVARQKLPGRSWSVPVIRHLFAPLKDYFACE 852aa, pigDNMT3B  
 HYTDVSNMGRVARQKLLGRSWSVPVIRHLFAPLKDYFACE 844aa, cattleDNMT3B  
 HYTDVSNMGRGARQKLLGRSWSVPVIRHLFAPLKDYFACE 774aa, horseDNMT3B  
 HYTDVSNMGRGARQKLLGRSWSVPVIRHLFAPLKDYFACE 859aa, ratDNMT3B  
 HYTDVSNMGRGARQKLLGRSWSVPVIRHLFAPLKDYFACE 859aa, mouseDNMT3B  
 HYTDVSNMGRGARQKLLGRSWSVPVIRHLFAPLKDYFACE 756aa, opossumDNMT3B  
 HYTDVSNMGRGARQKLLGRSWSVPVIRHLFAPLKDYFACE 816aa, zebrafishDNMT3B
