# Supplementary material for: Expression Patterns and miRNA Regulation of DNA Methyltransferases in Chicken Primordial Germ Cells
Source: PubMed Central journal article supplement (PMC3086922; doi:10.1371/journal.pone.0019524), 2011-05-03
Supplement: pone.0019524.s004.pdf [file pone.0019524.s004.pdf]

-----CCACGCTGCATCCCTCGTCTCTCCGTCACACGAGCT 39  
TTCAGCCAGGCCCAAGCCACTGGGGTGTGTGGCAGAGCCAGGACCCAGGAGGTGTGATTCTGAAGGCATCCC--CAGGCCTGCTCTTCCCTCAGCT 98  
TTCTACCCAGGACTGGGGAGCTCTCG-----GTCAGAGCCAGTGCCAGAGTCAACCCTCCCTGAAGGCACCTCACCTGTCCCTTTTTAGTCTCACCT 93

CTGCTG-----CCCGGGGAGGGCTCAGCCCTGTGCCACCATTCCCAGCACTGTGCCCCCGCTGCCGACGG-----CTCGGAAGCGCCTTCAACCA 127  
GTGTGGG---TCATACCG-TGTACCTCAGTTCCCTCTTGTCTCAGTGGGGCAGAGCCACCTGACTCTTGCAGGGGTAGCCTGAGGTGCCGCCTCCTTGTG 194  
GTGTGGGGCTCACATCACTGTACCTCAGCTTTCTCCTGCTCAGTGGGAGCAGACCTCCTGCCCTTGCAGGGGAGCCCC--GGTGTCCCTCCGTGTG 191

AAGAACCTGG--CCGGGTGCCTT-----CCTGACAGGGACTACAGCCAGCGCTGCCTGGGAAATGATGGAC--AAAACGAGCTTTAAT-CACCCAGCAC 216  
CACAAATCAGACCTGGCTGCTTGGAGCAGCCTAACACGGTGCTATTTTTTCTCTCCATAAACTTTAAACTTGAAGTAGGTAGCAACGTGGCTTTTTT 294  
CACAGCTCAGACCTGGCTGCTTAGAGTAGCCCGCATGGTGCTCATGTTCTCTTACCCTGAACTTTAAACTTGAAGTAGGTAGTAAGATGGCTTTCTT 291

AAAGCTGCGTGCATCACTGATGAGGC-GAGAAGTCTCCTCCAGAGCATTAAACATTTCCACTTGAGCCCAGAGCTGGGAAGCAGTGTGTTGGGAGGCAGC 315  
TTTTTCCCTTCCCTGGGTCTACCCTCAGAGAAAACAATGGCTAAGATACCAAA-ACCACAG-TGCCGACAGCTCTCCAATACTCAGGTTAATGCTGAAAAA 392  
T---TACCTCTGAGTTTATCACTCAGA--AGTGATGGCTAAGATACCAAA-AAAACAAAACAAAACAGAAACAAAAAACAACCAACAG 385

TGCTGGCGTGTGCAAAATGTGGACTGCA-GAGCTGCTCACCTCCTAAA-----CAAGCATAAACCTCTCTTGA--AACGACTGCCA--AAAACCTCAA 404  
TCATCCAAGA---CAGTT---ATGCAAGAG---TTTAATTTTGTAA---AAGTGGCTACTGCTCTGTGTTTACAGACGTGTGAGTGTAGCATGTA 479  
CTCTCTTAGTACTCAGGTTTATGCTGCAAAATCACTTGAGATTTTGTTTTAAAGTAACCCGTGCTCCACATTTGCTGGAGGATGCTATTGTGAATGTGGG 485

GCTGCAGCAGCAGGTGTGAGGGCCCCAGGTGAGGTTATGTACACTGAACGTGCAGAACACACAA-ACCAAATCTTTTTT--TTGTTTTTGTATTTTTAA 500  
GCTACAGGA-CATTTTTAAGGGCCAGGATCGTTTTTCC---CAGGGCAAGCAGAAGAGAAAATGTTTATATGTCTT---TTACCCGGCACATTCCC 571  
CTCAGATGAGCAAGGTCAAGGGGCCAAAAAATTTCCCTCTCCCCCAGGAGTATTTGAAGATGATGTTTATGGTTTAAAGTCTTCTGGCACCTTCCC 585

**miR-15c**

GACCTTTTTGTAATACTTTTACATTTTG-----TTGTTTAACTGCTAT**TGCTGCT**TTAAGGCATTACATACGAATGTGGAGAC-----TCCTAG 584  
CTTGCCATAATACAGGGCTGGAGTCTGCACGGGACCTATTAGATATTTT**CCACAATG**ATGATGATTTTCAGCAGGGATGACGTCATCATCACATTCAGG 671  
CTTGCTTTGGTACAAGGGCTGAAGTCTGTTGG---TCTGTAGCATTT**CCAGGATG**ATGATG---TCAGCAGGGATGACATCATCACC---TTTAGG 675

**miR-222**

ACCTGA**ATGTAGCT**-----GAGACTGAACTGTGAGCTGATAGAATTACTTTTCTAGTTAGGGAGATACTGTTTATGTGTTT**CAGCTGTAG**-TTT 672  
GCTATTT**TTTCCC**CCACAACCCAAAGGGCCAGGGCCACTCTTAGCTAAATCCCTCCCGTGACTGCAATAGAACCCTCTGGGGAGCTCAGGAAGGGGTGT 771  
GCT---**TTTCCC**T-----GGCAGGGGCC-CATGTGGCTAG--TCCTCACGAAGACTGGAGTAGAATGTTT---GGAGCTCAGGAAGGG-TGG 752

**miR-15c**

ACGGATATTCACTACGTCCTTTTCCA-----GGCATTTCCTTTTTTCTCCTGACGTTTCAAAA**TGCTGCT**GAGGGGGTTGGATG 752  
GCTGAGTTCTATAATAAGCTGCCATATATTTTGTAGACAAGTATGGTCTCCTCCATATCTCCCTCTTCCCTAGGAGAG**GAGTGTG**AAGGAGCTTA 871  
GTGGAGT-----GGC-----CCTCTTCCAGGTGTGAG**GATACGA**AAGGAGGAAGCTTA 800

GTTACACTGGGGCAGGAAATGGGGCTGTCTGAGAATGAGTGCATGGGGTGGGCAGGGGTGGGCCGCTGTTG---TCCCCCCCWCCCCCCCCGTGCTC 849  
GATAAGACACCCCTCAAACCCATCCCTCTCCAGGAGACTACCCTCCACAGGCACAGGTCCCCAGATGAGAAGTCTGCTACCCTCATTTCTCATCTTT 971  
GGGAAATCCATTTCCCACTCCCTCTTGCCAAATGAGGGGCCAGTCCCCAACAGCTCAGGTCCCCAGAA-----CCCCTAGTTCTCTCATG--- 886

TCACCCAGCA-GCAGCCCAGGACTGTGGGTGCCACCCGGCTGCCACCCCTCTGCCACCCATCTATGAGTTTTGTTCTTGGAGC----CACGTGGGC 944  
TTACTAACTCAGAGGCAGTGACAGCAGTCCAGGACAGACATACATTTCTCATCTTCCCCACATCTGAGAGATGACAGGGAAAAC-TGCAAAGCTCGG 1070  
-----AGAAGCTAGGAC-----CAGAAGCACAT---CGTTCCCTTATCTGAGCAGTGTGTTGGGAACTACAGTGAAAACCTTCTGGAGATGT 966

**miR-383**

TCCCTCAGTCGC-ATCCTCTGTTTCATGTGCTGGATCTCACCTCCCTTCAG**TCTGAT**CAAAAGGAAAAGAGAGAAAAGAAAGGACTCGGGGAAAGCAAAC 1043  
TGCTCCCTTTGGAGATTTTTAATCCTTTTTTATCCATAAGAAGTCGTTTT**TAGGGAGA**--ACGGGAATTCAGACAAGCTGCATTTAGAAAATGCTGTC 1168  
TAAAAGCTTTTT--ACCCACAGTAGATGTGTTTTTAAAGGGTGTCTTTTT**TAGGGG**CATCACTGGAGATAAGA-AAAGCTGCATTTAGAAAATGCCATC 1063

A-AAGGATAAAAAGGGGAMCAAGAACGGTCTBGCCTTAAGCTGACTTGATGAGAATCGCAGTA---GGACAAGTCTT-----TCCTTGGA----- 1124  
ATAATGGTTTTTAA-CACCTTTTACTCTCTTAC-TGGTGTATTTTGTAGAAATAAGGAACAACGTTGACAAGTTTTTGGGGCTTTTTATACACTTTTT 1266  
GTAATGGTTTTTAAACACCTTTTAC-CTAATTAC-AGGTCTATTTTATAGAA-----GCAGACAACACTT-----CTTTTTATG----- 1136

--ACGCT---GCCTTTCATGGTGTGCTCATCAACM-CATTGCAAGGAGAGGTACAGCTCAGAAATGCCTTTTTTTTAATGCTTTGTAAAGGTTTCTAACTC 1218  
AAAATCTCAAACCTCTATTTTTATGTTTAAAGCTTTTCAATAAAATTTTTTTGTAACCT--GGAGCCACGACGTAACAAATATGGGAAAAAACTGTGCCCT 1365  
--ACTCTCAGACTTCTATTTTCACTGTT-ACCATTTTTTTTGTAACTCGCAAGGTGTGG-GCTTTGTAACTTACAGGTTGGGGAGAGAC---TGCCCTT 1229

**miR-29b**

TCCC**TGGTGT**ATTTTTTTAGT--TAAAGGATTTTGTGTCCTAAAGTTTGTGGGTTTTTATACAATCTTTTTAAAATAAGAGRAAAAAAAAAAAGCCAA 1316  
GTTT**CAACAGT**TT-----TTGCTAATTTTTAGGCTGAAAGATGACGGATGCCCTAGAGTTTACCTTA-TGTTTAAATTAATAATCAGTATTTGTCTA 1453  
GTTT**CAACAGT**TTGTCTCCACTGTTTCTAATTTTTTAGTGTCAAAGATGACAGATGCCAGAGTTTACCTTTCTGGTTGATTAAGTT-GTATTTCTCTA 1328

AAAAAAAAAAAAAAAAAACCAGGGGGTCA 1348, Chicken  
AAAAAAAAAAAAAAAAA----- 1470, Human  
TAAAAAAAAA----- 1339, Mouse
